# Supplementary material for: Flexible and mechanically-stable MIL-101(Cr)@PFs for efficient benzene vapor and CO2adsorption
Source: Royal Society of Chemistry journal article supplement (doi:10.1039/c5ra17270e), 2015-01-01
Supplement: c5ra17270e1.pdf [file c5ra17270e1.pdf]

***Electronic Supporting Information (ESI)***

**Flexible and Mechanically-stable MIL-101(Cr)@PFs for Efficient Benzene Vapor and CO<sub>2</sub> Adsorption**

**Zhenyu Zhou<sup>a</sup>, Baihua Cheng<sup>a</sup>, Chen Ma<sup>a</sup>, Feng Xu<sup>b</sup>, Jing XIAO<sup>b\*\*</sup>, Qinbin Xi<sup>b</sup>,  
Zhong LI<sup>a\*</sup>**

*a. School of Chemistry and Chemical Engineering, South China University of Technology, Guangzhou, 510640, China*

*b. Key Laboratory of Enhanced Heat Transfer and Energy Conservation of the Ministry of Education, South China University of Technology, Guangzhou, 510640, China*

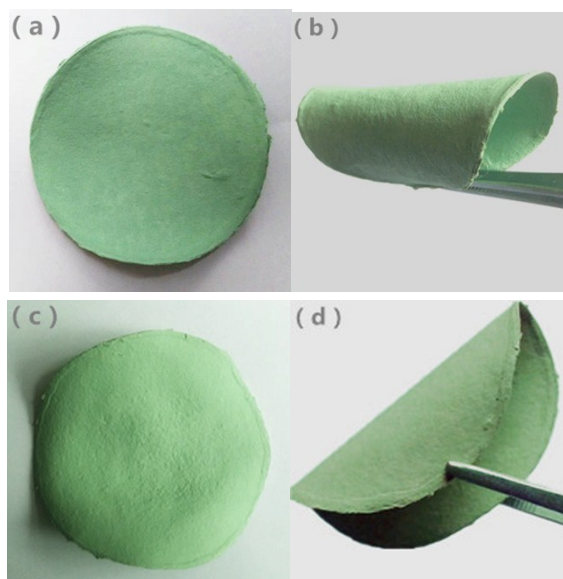

**Fig. S1** Pictures of 50MIL-101(Cr)@PFs(a) and its flexibility performance(b);67MIL-101(Cr)@PFs(c) and its flexibility performance (d).

\*\* Corresponding authors; E-mail addresses: [cejingxiao@scut.edu.cn](mailto:cejingxiao@scut.edu.cn) (Jing Xiao)

\* Corresponding authors; E-mail addresses: [cezhli@scut.edu.cn](mailto:cezhli@scut.edu.cn) (Zhong Li);

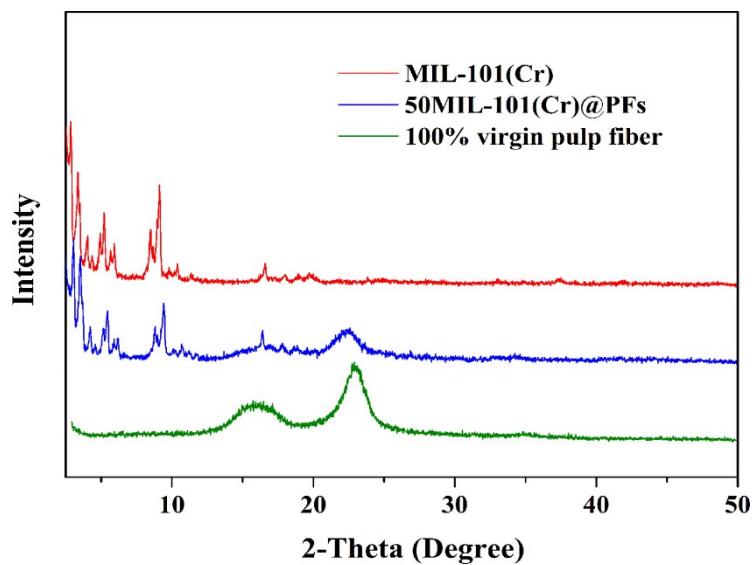

Fig. S2 PXR D pattern of MIL-101(Cr)@PFs

Table S1 Textural properties of MIL-101(Cr) and MIL-101(Cr)@PFs

| Samples            | BET surface area (m <sup>2</sup> /g) | Langmuir surface area (m <sup>2</sup> /g) |
|--------------------|--------------------------------------|-------------------------------------------|
| 25MIL-101(Cr)@PFs  | 812                                  | 1188                                      |
| 40 MIL-101(Cr)@PFs | 1256                                 | 1703                                      |
| 50 MIL-101(Cr)@PFs | 1630                                 | 2318                                      |
| 67 MIL-101(Cr)@PFs | 2174                                 | 2974                                      |
| MIL-101(Cr)        | 3347                                 | 4687                                      |

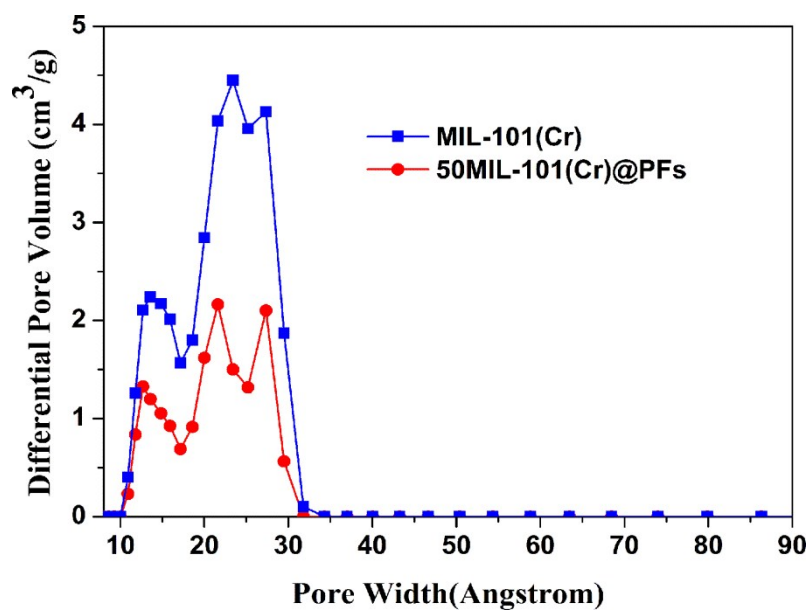

Fig. S3 Pore size distribution of MIL-101(Cr) and 50MIL-101(Cr)@PFs

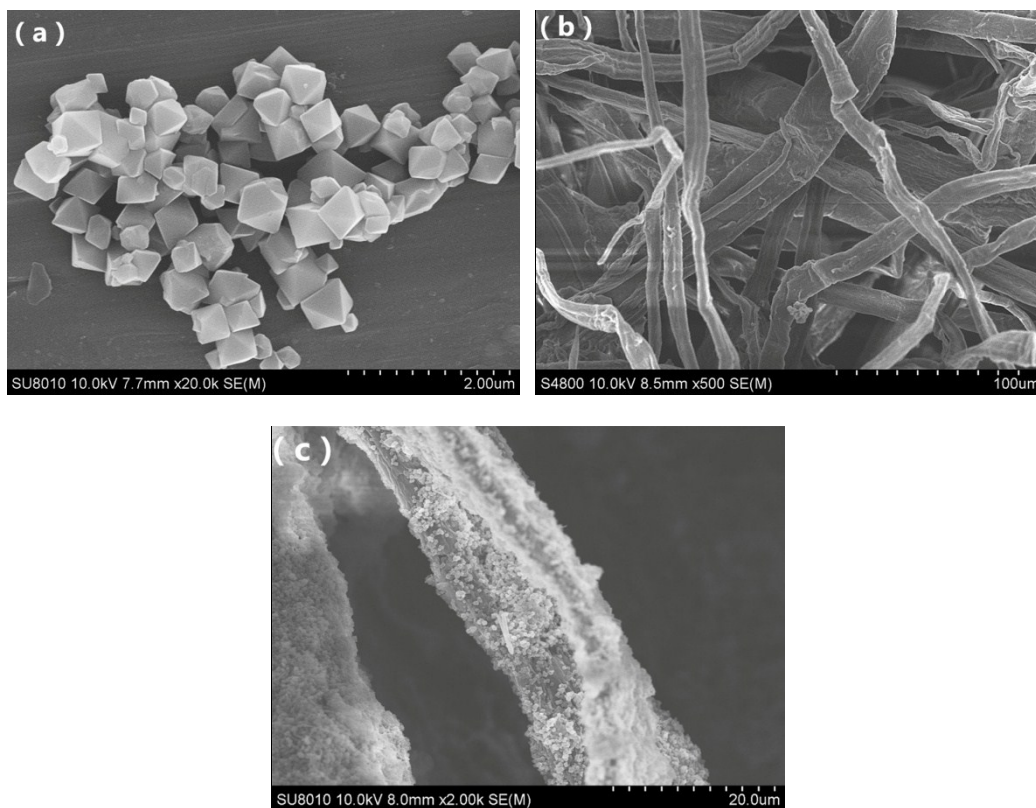

Fig. S4 SEM pictures of (a) MIL-101(Cr), (b) virgin pulp fibers, (c) 50MIL-101(Cr)@PFs

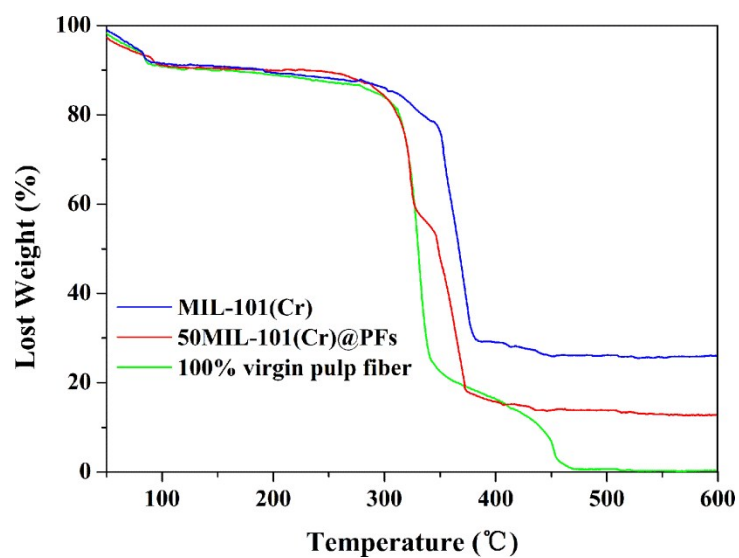

Fig.S5 TGA Curves of MIL-101(Cr)@PFs, MIL-101(Cr) and virgin pulp fiber

**Table S2** Benzene and CO<sub>2</sub> adsorption capacities of MIL-101(Cr) and MIL-101(Cr)@PFs at 298 K

| Samples           | Benzene vapor uptake when P ≈ 25 mbar (mmol/g) | The percentages of benzene vapor uptake on MIL-101(Cr)@PFs to MIL-101(Cr) | CO <sub>2</sub> uptake at 1 bar (mmol/g) | The percentages of CO <sub>2</sub> uptake on MIL-101(Cr)@PFs to MIL-101(Cr) |
|-------------------|------------------------------------------------|---------------------------------------------------------------------------|------------------------------------------|-----------------------------------------------------------------------------|
| 25MIL-101(Cr)@PFs | 4.1                                            | 24.8%                                                                     | 0.80                                     | 24.7%                                                                       |
| 40MIL-101(Cr)@PFs | 6.47                                           | 39.1%                                                                     | 1.25                                     | 38.6%                                                                       |
| 50MIL-101(Cr)@PFs | 8.06                                           | 48.7%                                                                     | 1.56                                     | 48.1%                                                                       |
| 67MIL-101(Cr)@PFs | 10.29                                          | 62.2%                                                                     | 2.13                                     | 65.7%                                                                       |
| MIL-101(Cr)       | 16.54                                          | 100%                                                                      | 3.24                                     | 100%                                                                        |

**Table S3** CO<sub>2</sub> uptakes of some MOFs and conventional adsorbents at 1 bar.

| Adsorbent        | Adsorption capacity (mmol/g) | Temperature (K) | Reference |
|------------------|------------------------------|-----------------|-----------|
| MCM-41           | 0.67                         | 298             | 1         |
| Zeolite-13X      | ~1.70                        | 298             | 2         |
| ZSM-5            | ~1.50                        | 303             | 3         |
| Activated carbon | 2.0                          | 298             | 4         |
| ZIF-68           | 1.69                         | 298             | 5         |
| UIO-66           | 1.79                         | 298             | 6         |
| MOF-5            | 2.10                         | 296             | 7         |
| MIL-100(Cr)      | ~2.23                        | 298             | 8         |
| 67MIL-101(Cr)@Fs | 2.13                         | 298             | This work |
| MIL-101(Cr)      | 3.24                         | 298             | This work |

**Table S4** Fitting parameters of L-F model for benzene adsorption on MIL-101(Cr) and MIL-101(Cr)@PFs

|                | MIL-101(Cr) | 67MIL-101(Cr)@PFs | 50MIL-101(Cr)@PFs | 40MIL-101(Cr)@PFs | 25MIL-101(Cr)@PFs |
|----------------|-------------|-------------------|-------------------|-------------------|-------------------|
| q              | 17.296      | 10.404            | 8.518             | 7.056             | 5.091             |
| b              | 0.0140      | 0.0347            | 0.0344            | 0.0434            | 0.0566            |
| c              | 2.424       | 2.033             | 2.070             | 1.914             | 1.626             |
| R <sup>2</sup> | 0.9826      | 0.9857            | 0.9865            | 0.9754            | 0.9747            |

**Table S5** Fitting parameters of L-F model for CO<sub>2</sub> adsorption on MIL-101(Cr) and MIL-101(Cr)@PFs

|                | MIL-101(Cr) | 67MIL-101(Cr)@PFs | 50MIL-101(Cr)@PFs | 40MIL-101(Cr)@PFs | 25MIL-101(Cr)@PFs |
|----------------|-------------|-------------------|-------------------|-------------------|-------------------|
| q              | 16.798      | 15.684            | 6.738             | 4.556             | 5.270             |
| b              | 0.237       | 0.157             | 0.304             | 0.377             | 0.180             |
| c              | 0.613       | 0.773             | 0.836             | 0.953             | 0.865             |
| R <sup>2</sup> | 0.9997      | 0.9999            | 0.9999            | 0.9999            | 0.9999            |

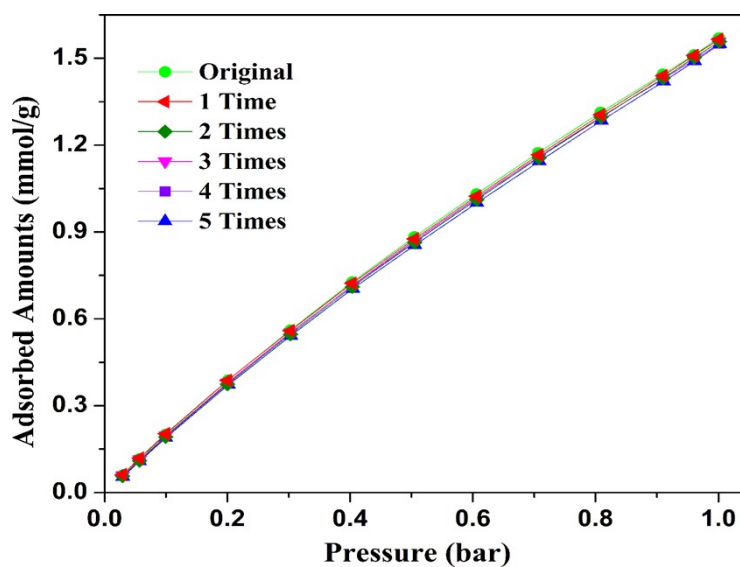

**Fig.S6** CO<sub>2</sub> isotherms of 50MIL-101(Cr)@PFs at 298 K(regeneration for five times).

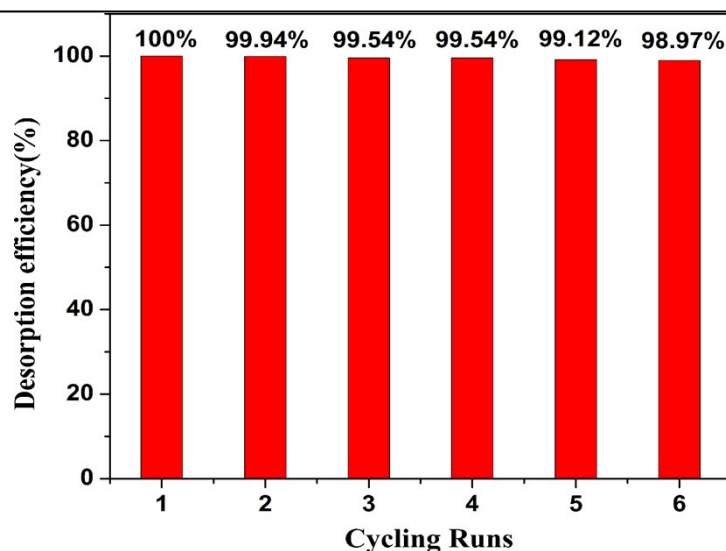

**Fig.S7** Cycling adsorption/desorption runs of 50MIL-101(Cr)@PFs with the average value and standard error of desorption efficiency of 99.52% and 0.156%.

## REFERENCE

1. J. Zhou, H. Zhao, J. Li, Y. Zhu, J. Hu, H. Liu and Y. Hu, *Solid State Sciences*, 2013, **24**, 107-114.
2. J. McEwen, J.-D. Hayman and A. O. Yazaydin, *Chemical Physics*, 2013, **412**, 72-76.
3. Y. Li, H. Yi, X. Tang, F. Li and Q. Yuan, *Chemical Engineering Journal*, 2013, **229**, 50-56.
4. R.-L. Tseng, F.-C. Wu and R.-S. Juang, *Separation and Purification Technology*, 2015, **140**, 53-60.
5. R. Banerjee, H. Furukawa, D. Britt, C. Knobler, M. O’Keeffe and O. M. Yaghi, *Journal of the American Chemical Society*, 2009, **131**, 3875-3877.
6. Z. Hu, M. Khurana, Y. H. Seah, M. Zhang, Z. Guo and D. Zhao, *Chem. Eng. Sci.*, 2015, **124**, 61-69.
7. Z. Zhao, Z. Li and Y. Lin, *Industrial & Engineering Chemistry Research*, 2009, **48**, 10015-10020.
8. L. Li, J. Yang, J. Li, Y. Chen and J. Li, *Microporous Mesoporous Mat.*, 2014, **198**, 236-246.
